# Supplementary material for: Characterisation of innate lymphoid cell subsets infiltrating colorectal carcinoma
Source: PubMed Central journal article supplement — Gut. 2020 Mar 5;69(12):2261–3. doi: 10.1136/gutjnl-2020-320908 (PMC7677477; doi:10.1136/gutjnl-2020-320908), 2020-03-05
Supplement: gutjnl-2020-320908supp001.pdf [file gutjnl-2020-320908supp001.pdf]

| Code | TNM stage | Dukes stage | Grade | MSI | Localization | Sex |
|------|-----------|-------------|-------|-----|--------------|-----|
| #1   | IIIc      | C2          | 3     |     | RT           | F   |
| #2   | IIa       | B2          | 4     | yes | TR           | M   |
| #3   | IIIb      | C2          | 2     |     | RT           | F   |
| #4   | IIa       | B2          | 2     |     | DX           | F   |
| #5   | IIa       | B2          | 2     | yes | DX           | M   |
| #6   | IIIb      | C2          | 2     |     | RT           | M   |
| #7   | IIa       | B2          | 2     |     | SG           | M   |
| #8   | IIb       | B2          | 2     |     | SG           | M   |
| #9   | IIa       | B2          | 2     | yes | DX           | F   |
| #10  | IIa       | B2          | 2     |     | DX           | M   |
| #11  | IIa       | B2          | 2     |     | SG           | M   |
| #12  | IIa       | B2          | 2     |     | RT           | M   |
| #13  | IIb       | B2          | 2     |     | TR           | M   |
| #14  | IIb       | B2          | 2     |     | DX           | M   |
| #15  | IIa       | B2          | 3     |     | DX           | M   |
| #16  | IIa       | B2          | 2     |     | SG           | M   |
| #17  | IIIb      | C2          | 2     |     | SG           | M   |
| #18  | IIa       | B2          | 2     | yes | DX           | F   |
| #19  | IIa       | B2          | 1     |     | SG           | M   |
| #20  | IVb       | D           | 3     | yes | DX           | M   |
| #21  | IIa       | B2          | 2     |     | SG           | M   |
| #22  | IIIc      | C2          | 3     |     | RT           | M   |
| #23  | IIIb      | C2          | 2     |     | RT           | M   |
| #24  | IIa       | B2          | 2     |     | SG           | F   |
| #25  | IIa       | B2          | 1     |     | RT           | F   |
| #26  | IIIb      | C2          | 2     |     | SG           | M   |
| #27  | IIIb      | C2          | 2     |     | RT           | M   |
| #28  | IIa       | B2          | 2     |     | TR           | M   |
| #29  | IIIc      | C2          | 3     |     | DX           | F   |
| #30  | IIa       | B2          | 3     | yes | DX           | F   |
| #31  | IIa       | B2          | 2     |     | RT           | M   |
| #32  | IIa       | B2          | 2     |     | RT           | M   |
| #33  | IIIb      | C2          | 3     | yes | DX           | F   |
