# Supplementary figures and images for: Characterisation of innate lymphoid cell subsets infiltrating colorectal carcinoma
Source: HighWire-hosted journal article supplement (doi:10.1136/gutjnl-2020-320908), 2020-03-05

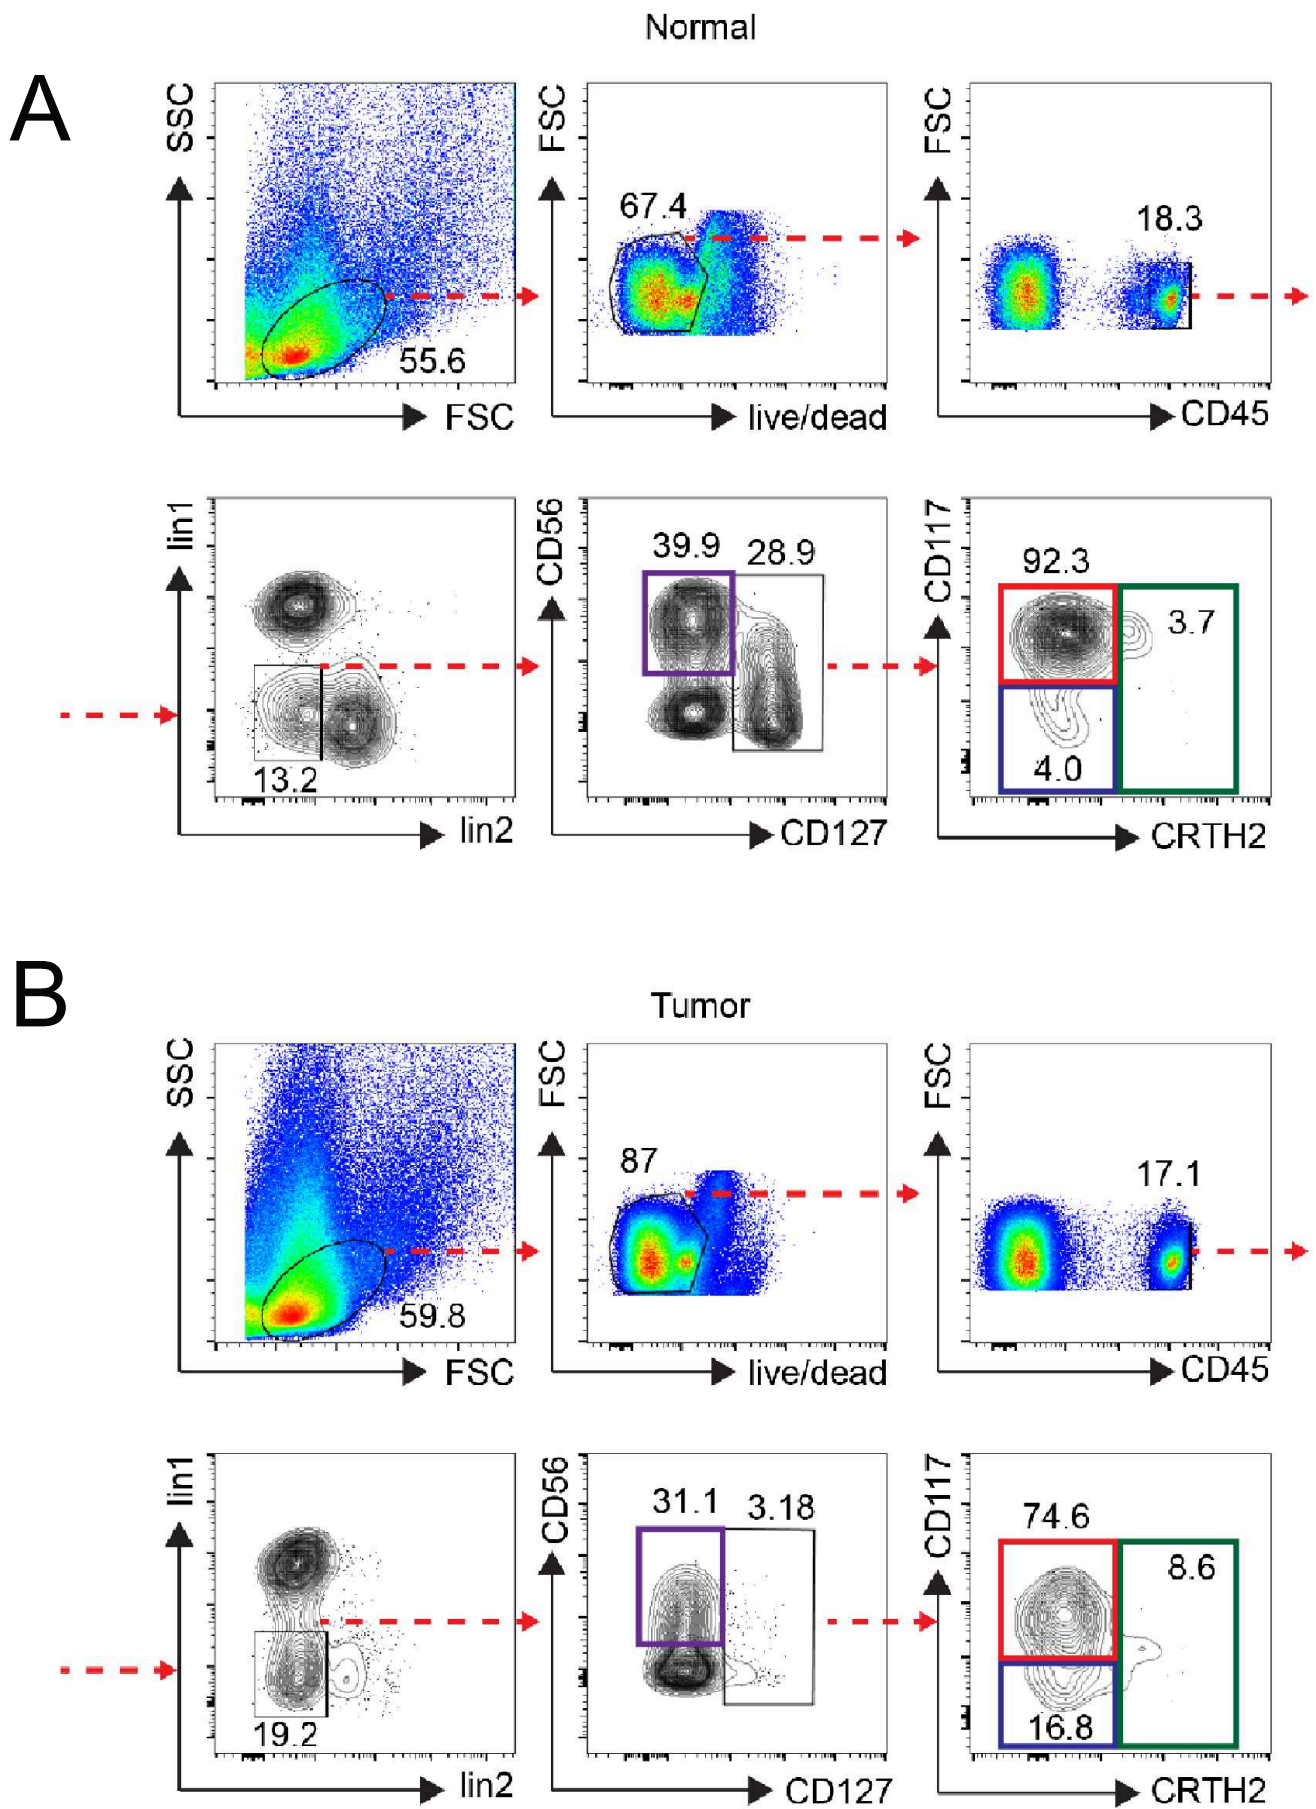

Supplement: gutjnl-2020-320908supp003_data_supplement.pdf [file gutjnl-2020-320908supp003_data_supplement.pdf]
